# Supplementary material for: The Marine Natural Product Manzamine A Targets Vacuolar ATPases and Inhibits Autophagy in Pancreatic Cancer Cells
Source: MDPI journal article supplement (doi:10.3390/md11093500), 2013-09-17
Supplement: s1 [file s1]

marinedrugs-11-03500-s001.mol
  corina  12171322323D 1   1.00000     0.00000 
CORINA 3.49 0023  12.04.2013
 43 50  0  0  0  0  0  0  0  0999 V2000
    0.4350    1.3070   -0.9436 C   0  0  0  0  0  0  0  0  0  0  0  0
    0.4317   -0.0121   -0.9060 N   0  0  0  0  0  0  0  0  0  0  0  0
    1.1327   -0.6983   -0.0126 C   0  0  0  0  0  0  0  0  0  0  0  0
    1.9148   -0.0275    0.9394 C   0  0  0  0  0  0  0  0  0  0  0  0
    1.9335    1.3760    0.9183 C   0  0  0  0  0  0  0  0  0  0  0  0
    1.1767    2.0454   -0.0446 C   0  0  0  0  0  0  0  0  0  0  0  0
    2.7291   -0.4576    1.9658 N   0  0  0  0  0  0  0  0  0  0  0  0
    3.2854    0.6246    2.6233 C   0  0  0  0  0  0  0  0  0  0  0  0
    2.8228    1.8000    2.0108 C   0  0  0  0  0  0  0  0  0  0  0  0
    4.1576    0.7174    3.7039 C   0  0  0  0  0  0  0  0  0  0  0  0
    4.5590    1.9529    4.1629 C   0  0  0  0  0  0  0  0  0  0  0  0
    4.1012    3.1132    3.5568 C   0  0  0  0  0  0  0  0  0  0  0  0
    3.2368    3.0427    2.4864 C   0  0  0  0  0  0  0  0  0  0  0  0
    1.0889   -2.1816   -0.0201 C   0  0  0  0  0  0  0  0  0  0  0  0
   -0.2353   -2.8893    0.1029 C   0  0  0  0  0  0  0  0  0  0  0  0
   -0.2730   -4.1171   -0.7740 C   0  0  0  0  0  0  0  0  0  0  0  0
    1.0331   -4.9174   -0.8831 C   0  0  0  0  0  0  0  0  0  0  0  0
    2.1863   -4.3862   -0.1359 C   0  0  0  0  0  0  0  0  0  0  0  0
    2.2142   -2.8656   -0.1545 C   0  0  0  0  0  0  0  0  0  0  0  0
   -0.6380   -3.1187    1.5443 C   0  0  0  0  0  0  0  0  0  0  0  0
   -0.9169   -4.5837    1.8343 C   0  0  0  0  0  0  0  0  0  0  0  0
   -1.8688   -5.1710    0.9064 N   0  0  0  0  0  0  0  0  0  0  0  0
   -1.4205   -5.0609   -0.4784 C   0  0  0  0  0  0  0  0  0  0  0  0
   -2.1458   -6.5954    1.1897 C   0  0  0  0  0  0  0  0  0  0  0  0
   -1.0810   -7.3110    1.9942 C   0  0  0  0  0  0  0  0  0  0  0  0
   -0.2565   -8.2469    1.1048 C   0  0  0  0  0  0  0  0  0  0  0  0
    0.9453   -8.7813    1.8795 C   0  0  0  0  0  0  0  0  0  0  0  0
    2.2383   -8.5077    1.1604 C   0  0  0  0  0  0  0  0  0  0  0  0
    2.6711   -7.2642    1.0469 C   0  0  0  0  0  0  0  0  0  0  0  0
    1.8068   -6.1914    1.6380 C   0  0  0  0  0  0  0  0  0  0  0  0
    2.2176   -4.7722    1.3596 C   0  0  0  0  0  0  0  0  0  0  0  0
   -0.9925   -2.1737   -0.3247 H   0  0  0  0  0  0  0  0  0  0  0  0
   -0.5280   -3.5896   -2.2163 C   0  0  0  0  0  0  0  0  0  0  0  0
    0.4157   -4.3642   -3.1136 C   0  0  0  0  0  0  0  0  0  0  0  0
    1.0776   -5.4491   -2.2751 N   0  0  0  0  0  0  0  0  0  0  0  0
   -0.3066   -5.0321   -4.2371 C   0  0  0  0  0  0  0  0  0  0  0  0
    2.4314   -5.3874   -2.9335 C   0  0  0  0  0  0  0  0  0  0  0  0
   -0.2823   -6.2896   -4.5361 C   0  0  0  0  0  0  0  0  0  0  0  0
    2.8424   -6.8432   -3.1884 C   0  0  0  0  0  0  0  0  0  0  0  0
    0.4629   -7.3711   -3.8135 C   0  0  0  0  0  0  0  0  0  0  0  0
    1.9200   -7.4236   -4.2659 C   0  0  0  0  0  0  0  0  0  0  0  0
    1.2094   -3.7145   -3.4833 H   0  0  0  0  0  0  0  0  0  0  0  0
    3.4871   -4.8298   -0.5584 O   0  0  0  0  0  0  0  0  0  0  0  0
  1  2  1  0      
  2  3  2  0      
  3  4  1  0      
  4  5  2  0      
  5  6  1  0      
  6  1  2  0      
  4  7  1  0      
  7  8  1  0      
  8  9  2  0      
  5  9  1  0      
  8 10  1  0      
 10 11  2  0      
 11 12  1  0      
 12 13  2  0      
 13  9  1  0      
  3 14  1  0      
 14 15  1  0      
 15 16  1  0      
 16 17  1  0      
 17 18  1  0      
 18 19  1  0      
 19 14  2  0      
 15 20  1  0      
 20 21  1  0      
 21 22  1  0      
 22 23  1  0      
 23 16  1  0      
 22 24  1  0      
 24 25  1  0      
 25 26  1  0      
 26 27  1  0      
 29 30  1  0      
 30 31  1  0      
 18 31  1  0      
 15 32  1  0      
 16 33  1  0      
 33 34  1  0      
 34 35  1  0      
 34 36  1  0      
 35 37  1  0      
 36 38  2  0      
 37 39  1  0      
 38 40  1  0      
 40 41  1  0      
 41 39  1  0      
 27 28  1  0      
 34 42  1  0      
 18 43  1  0      
 35 17  1  0      
 28 29  2  0      
M  END
$$$$
