# Supplementary material for: The Marine Natural Product Manzamine A Targets Vacuolar ATPases and Inhibits Autophagy in Pancreatic Cancer Cells
Source: MDPI journal article supplement (doi:10.3390/md11093500), 2013-09-17
Supplement: s2 [file s2]

marinedrugs-11-03500-s001.mol
  ChemDraw11291308412D

 43 50  0  0  0  0  0  0  0  0999 V2000
   -1.0717    3.1297    0.0000 C   0  0  0  0  0  0  0  0  0  0  0  0
   -1.0717    2.3047    0.0000 N   0  0  0  0  0  0  0  0  0  0  0  0
   -0.3572    1.8922    0.0000 C   0  0  0  0  0  0  0  0  0  0  0  0
    0.3572    2.3047    0.0000 C   0  0  0  0  0  0  0  0  0  0  0  0
    0.3572    3.1297    0.0000 C   0  0  0  0  0  0  0  0  0  0  0  0
   -0.3572    3.5422    0.0000 C   0  0  0  0  0  0  0  0  0  0  0  0
    1.0717    1.8922    0.0000 N   0  0  0  0  0  0  0  0  0  0  0  0
    1.7862    2.3047    0.0000 C   0  0  0  0  0  0  0  0  0  0  0  0
    1.7862    3.1297    0.0000 C   0  0  0  0  0  0  0  0  0  0  0  0
    2.5006    1.8922    0.0000 C   0  0  0  0  0  0  0  0  0  0  0  0
    3.2151    2.3047    0.0000 C   0  0  0  0  0  0  0  0  0  0  0  0
    3.2151    3.1297    0.0000 C   0  0  0  0  0  0  0  0  0  0  0  0
    2.5006    3.5422    0.0000 C   0  0  0  0  0  0  0  0  0  0  0  0
   -0.3572    1.0672    0.0000 C   0  0  0  0  0  0  0  0  0  0  0  0
   -1.0717    0.6547    0.0000 C   0  0  0  0  0  0  0  0  0  0  0  0
   -1.0717   -0.1703    0.0000 C   0  0  0  0  0  0  0  0  0  0  0  0
   -0.3572   -0.5828    0.0000 C   0  0  0  0  0  0  0  0  0  0  0  0
    0.3572   -0.1703    0.0000 C   0  0  0  0  0  0  0  0  0  0  0  0
    0.3572    0.6547    0.0000 C   0  0  0  0  0  0  0  0  0  0  0  0
   -1.7862    1.0672    0.0000 C   0  0  0  0  0  0  0  0  0  0  0  0
   -2.5006    0.6547    0.0000 C   0  0  0  0  0  0  0  0  0  0  0  0
   -2.5006   -0.1703    0.0000 N   0  0  0  0  0  0  0  0  0  0  0  0
   -1.7862   -0.5828    0.0000 C   0  0  0  0  0  0  0  0  0  0  0  0
   -3.2151   -0.5828    0.0000 C   0  0  0  0  0  0  0  0  0  0  0  0
   -2.8026   -1.2972    0.0000 C   0  0  0  0  0  0  0  0  0  0  0  0
   -2.0881   -0.8847    0.0000 C   0  0  0  0  0  0  0  0  0  0  0  0
   -1.3737   -1.2972    0.0000 C   0  0  0  0  0  0  0  0  0  0  0  0
   -0.6592   -0.8847    0.0000 C   0  0  0  0  0  0  0  0  0  0  0  0
    0.1658   -0.8847    0.0000 C   0  0  0  0  0  0  0  0  0  0  0  0
    0.8803   -1.2972    0.0000 C   0  0  0  0  0  0  0  0  0  0  0  0
    1.0938   -0.5003    0.0000 C   0  0  0  0  0  0  0  0  0  0  0  0
   -1.0717    1.4797    0.0000 H   0  0  0  0  0  0  0  0  0  0  0  0
   -1.2852   -0.9671    0.0000 C   0  0  0  0  0  0  0  0  0  0  0  0
   -0.7019   -1.5505    0.0000 C   0  0  0  0  0  0  0  0  0  0  0  0
    0.1231   -1.5505    0.0000 N   0  0  0  0  0  0  0  0  0  0  0  0
   -1.2852   -2.1339    0.0000 C   0  0  0  0  0  0  0  0  0  0  0  0
    0.7065   -2.1339    0.0000 C   0  0  0  0  0  0  0  0  0  0  0  0
   -1.2852   -2.9589    0.0000 C   0  0  0  0  0  0  0  0  0  0  0  0
    0.7065   -2.9589    0.0000 C   0  0  0  0  0  0  0  0  0  0  0  0
   -0.7019   -3.5422    0.0000 C   0  0  0  0  0  0  0  0  0  0  0  0
    0.1231   -3.5422    0.0000 C   0  0  0  0  0  0  0  0  0  0  0  0
   -1.5269   -1.5505    0.0000 H   0  0  0  0  0  0  0  0  0  0  0  0
    1.0717    0.2422    0.0000 O   0  0  0  0  0  0  0  0  0  0  0  0
  1  2  1  0      
  2  3  2  0      
  3  4  1  0      
  4  5  2  0      
  5  6  1  0      
  6  1  2  0      
  4  7  1  0      
  7  8  1  0      
  8  9  2  0      
  5  9  1  0      
  8 10  1  0      
 10 11  2  0      
 11 12  1  0      
 12 13  2  0      
 13  9  1  0      
  3 14  1  0      
 14 15  1  0      
 15 16  1  0      
 16 17  1  0      
 17 18  1  0      
 18 19  1  0      
 19 14  2  0      
 15 20  1  0      
 20 21  1  0      
 21 22  1  0      
 22 23  1  0      
 23 16  1  0      
 22 24  1  1      
 24 25  1  0      
 25 26  1  0      
 26 27  1  0      
 29 30  1  0      
 30 31  1  0      
 18 31  1  1      
 15 32  1  6      
 16 33  1  6      
 33 34  1  0      
 34 35  1  0      
 34 36  1  0      
 35 37  1  0      
 36 38  2  0      
 37 39  1  0      
 38 40  1  0      
 40 41  1  0      
 41 39  1  0      
 27 28  1  0      
 34 42  1  6      
 18 43  1  6      
 35 17  1  6      
 28 29  2  0      
M  END
